# 1 Promotion and Valilation of Flipped Teaching Based on 2 Video Conference in Standardized Training for Internal 3 Medicine Residents

4 **Xiao-Yu Zhang**<sup>1,2,3,\*</sup>

5 1 Section of Education, Shanghai Public Health Clinical Center, Fudan University,  
6 Shanghai, 201508, P. R. China.

7 2 Department of Liver Disease, Shanghai Public Health Clinical Center, Fudan University,  
8 Shanghai, 201508, P. R. China.

9 3 Public Health Education Professional Committee, Shanghai Preventive Medicine  
10 Association, Shanghai, P.R. China.

## 11 **\*Correspondence:**

12 Xiao-Yu Zhang , Shanghai Public Health Clinical Center, Fudan University, No.2901  
13 Caolang Road, Shanghai, 201508, P. R. China.

14 Tel: +8613052251333.

15 Email: [zhangxiaoyuPRC@163.com](mailto:zhangxiaoyuPRC@163.com)

## 16 **Abstract**

17 **Objective:** I aimed to verify the training effect of Flipped Teaching with Video  
18 Conference as carrier in the training of infectious diseases, and promote the  
19 application of this teaching mode in the standardized training for resident  
20 physicians.

21 **Methods:** The vertical management mode was adopted to carry out Flipped  
22 Teaching in the training, and the training of infectious diseases was carried out  
23 according to the requirements of the standardized training program for internal  
24 medicine resident. The residents trained in April were included in the trial group,  
25 and those trained in June were included in the validation group. The training of  
26 both groups was compared and analyzed.

27 **Results:** A total of 43 resident physicians participated in the training of infectious  
28 diseases by the Flipped Teaching based on Video Conference, all from tertiary  
29 hospitals. There were 19 participants in the trial group and 24 participants in the  
30 validation group, who carried out Flip Teaching with Video Conference as carrier  
31 for 31 times and 24 times respectively. The implementation rate of teaching plan  
32 was above 91% in both groups, and the attendance rate was above 98%; There was  
33 no significant difference on the attendance rate between the both groups,  $P>0.05$ .

**NOTE:** This preprint reports new research that has not been certified by peer review and should not be used to guide clinical practice.

34 952 effective feedback questionnaires were collected, including 395 in the trial  
35 group and 557 in the validation group. In terms of teaching quality, the indicators  
36 of "Rigorous teaching attitude" and "Punctual class" in the validation group were  
37 lower than those in the trial group,  $P < 0.05$ ; And the other indicators were no  
38 significant difference,  $P > 0.05$ ; All feedback of the teaching quality indexes "good  
39 and very good" accounted for more than 96%. In the overall evaluation, there was  
40 no significant difference between the both groups on the index of "Suggestions for  
41 improvement",  $P > 0.05$ ; And the "Praise highlight" of the validation group was  
42 higher than that of the trial group,  $P < 0.05$ .

43 **Conclusion:** The Flipped Teaching based on Video Conference is generally  
44 effective for internal medicine residents to carry out training of infectious diseases,  
45 with good feedback and strong feasibility. This teaching model can be further  
46 promoted and applied in the standardized training for resident physicians.

47 **[Key words]** Flipped teaching; Resident physician in internal medicine;  
48 Standardized training; Medical teaching

## 49 **Introduction**

50 In view of the fact that some standardized training bases for internal medicine  
51 residents did not meet the training standards of the Department of Infectious  
52 Diseases, those residents in the bases were assigned to a designated hospital to  
53 carry out the training of infectious diseases.[1] During the actual operation of the  
54 project, due to various subjective and objective reasons, the training cycle of  
55 internal medicine residents in the Department of Infectious Diseases might be  
56 insufficient in a certain period; Therefore, I explored to apply a new training  
57 method as a supplement to the standardized training for internal medicine  
58 residents.

59 From April 1 to April 4, 2022, I began to explore Flipped Teaching with Video  
60 Conference as the carrier to carry out infectious disease training for internal  
61 medicine residents. This teaching mode was generally effective and could be used  
62 as a supplementary training method for standardized training of internal medicine  
63 residents, to make up for the lack of clinical training time for the residents due to  
64 holidays or emergencies.[2] Therefore, I conducted the infectious disease training  
65 for internal medicine residents with Flipped Teaching based on Video Conference  
66 in whole April.

67 In order to further verify the effect and with Video Conference as carrier of  
68 Flipped Teaching with Video Conference as the carrier in the training of infectious  
69 diseases, I once again carried out the Flipped Teaching based on Video  
70 Conference for residents whose the original plan was arranged to the designated

71 hospitals for infectious disease training in June 2022, which provided data support  
72 and experience summary for whether promoting the application of the teaching  
73 mode in the field of standardized training for resident physicians.

## 74 **Objects and Methods**

### 75 **Subjects and Grouping**

76 The study objects were internal medicine residents who planned to take training in  
77 training in the Department of Infectious Diseases of the designated hospital in  
78 April and June. And they were also physicians who had been participating in the  
79 standardized training for residents in Shanghai. Their dispatched hospital had  
80 signed an Agreement on Joint Training of Internal Medicine Residents with the  
81 designated hospital.

82 Residents who participated in the infectious diseases training with Flipped  
83 Teaching based on Video Conference in April and June were all included in the  
84 study, which was divided into two groups. Trial group: residents who participated  
85 in the infectious diseases training with Flipped Teaching based on Video  
86 Conference in April; Validation group: residents who participated in the infectious  
87 diseases training with Flipped Teaching based on Video Conference in June.

88 The informed consents of participants in internal medicine residents were  
89 obtained, including their data being used for the training and the research, and  
90 that this study was conducted in accordance with the Declaration of Helsinki.

### 91 **Construction of Flipping Teaching with Video Conference as the Carrier[2]**

92 The Flipped Teaching with Video Conference as the carrier adopted "vertical  
93 management mode" for management[2,3], and training plan was formulated; All  
94 residents participated in teaching and evaluation. According to the training  
95 requirements of the Department of Infectious Diseases in the Standardized  
96 Training Content and Standard for Resident Physicians (2021 Edition) -- Internal  
97 Medicine Training Rules, residents chose training topics and contents, and  
98 determined the teaching time within the training cycle; Teaching programmes and  
99 implementation plans for the cycle would be identified after all training content  
100 and teaching time were determined; Residents developed PPT and clinical  
101 teaching based on the latest clinical guidelines and expert consensus. The whole  
102 teaching activity was carried out online by Video Conference, involving teaching  
103 organization, training, after-class discussion, teaching feedback, quality control  
104 and teaching management, etc.

### 105 **Evaluation Indexes and Methods**

106 Seven teaching plan indicators (topic selection based on training syllabus, teaching  
107 on the planned time, teaching on the planned content, making PPT fully, providing  
108 references, unifying the teaching content and training program, and participating  
109 in after-class discussion) were established to evaluate the implementation of the  
110 teaching plan. Nine teaching quality indicators (rigorous teaching attitude,  
111 punctual class, detailed and accurate teaching content, reasonable structure and  
112 clear process, highlighting teaching key points, clear teaching difficulties, accurate  
113 and refined language, combining theory with clinical practice, and improving  
114 ability to analyze and deal with the disease) were used to evaluate the teaching  
115 quality. Two attendance indicators (online on time, and end on time) were  
116 established to evaluate the online attendance of internal medicine residents. And  
117 three overall evaluation indicators (suggestions for improvement, no special  
118 suggestions, and praise highlights) were established to evaluate the overall  
119 situation of this teaching.

120 Teaching plan index and attendance index were completed online in real time,  
121 teaching quality index and overall evaluation index were completed by  
122 questionnaire star. Among them, teaching plan index, attendance index, and  
123 teaching quality index were objective indexes, while overall evaluation index was  
124 subjective index. Content analysis method was adopted for subjective indicators.  
125 Such as: The feedback of improvement needed or deficiency was classified as  
126 "improvement suggestions"; All the teaching was recognized, and all the  
127 evaluation content was praise highlights or learning achievements, and no  
128 feedback for improvement needed or deficiency was put forward, the feedback of  
129 the above was classified as "praise highlights"; The feedback on this teaching  
130 without suggestions was classified as "none" or "no special suggestions".

### 131 **Software Application**

132 Video Conference adopted Tencent Conference software to carry out online  
133 teaching, PPT playing, lecturing by residents, participating in questions, online  
134 answering, online check-in and discussion, dynamic monitoring, whole-process  
135 management, etc.

136 The software Questionnaire Star was used to develop 9 teaching quality  
137 indicators and 3 overall indicators, and carry out questionnaire star survey after  
138 class.

139 SPSS software version 23.0 (SPSS Inc. Chicago, IL, USA) was used for statistical  
140 analysis of the data. The data conforming to normal distribution were expressed as  
141 mean  $\pm$  standard deviation to reflect the distribution of the study indicators. The  
142 counting data was represented by example (%) to reflect the composition ratio of

143 the study indicators. Pearson Chi-square test or Fisher's exact probability method  
144 was used for the counting data, and T test was used for data conforming to normal  
145 distribution. A P value of two-sided less than 0.05 was considered as statistically  
146 significant.

## 147 **Results**

### 148 **Basic Information of Residents Participating in the Study**

149 In this teaching research, a total of 43 residents participated in the infectious  
150 diseases training with Flipped Teaching based on Video Conference, all from  
151 tertiary hospitals. There were 19 resident physicians in the trial group, with an  
152 average age of 29.5 years, and male accounted for 47.4%; There were 24  
153 residents in the validation group, with an average age of 28.5 years and 25.0% male.  
154 There were no significant differences in sexuality, age, education background,  
155 qualified as a licensed physician, and training phase between the both groups ( $P >$   
156 0.05). The detailed information is shown in Table 1.

### 157 **Evaluation of Teaching Plan Implementation**

158 The trial group carried out 31 Flipped Teaching sessions, and the verification group  
159 carried out 24 Flipped Teaching sessions. In the trial group and the validation  
160 group, the times of "teaching on the planned time" were 29 times and 22 times,  
161 accounting for 93.5% and 91.7%, respectively; and there was no significant  
162 difference between the both groups in other teaching performance indicators,  
163 including "topic selection based on training syllabus", "teaching on the planned  
164 content", "making PPT fully", "providing references", "providing references",  
165 and "Providing references",  $P > 0.05$ . In the both groups, the proportion of the  
166 other teaching performance indicators conforming to the training plan was 100%.  
167 The detailed information is shown in Table 2.

### 168 **Teaching Attendance**

169 The attendance was checked for the whole process of the Flipped Teaching based  
170 on Video Conference, while "online on time" and "end on time" two time nodes  
171 were included in the statistics. In the trial group, the total attendance times of  
172 "online on time" and "end on time" were 585 times and 588 times, accounting for  
173 99.3% and 99.8% respectively. In the validation group, the total attendance times of  
174 "online on time" and "end on time" were 566 times and 574 times, accounting for  
175 98.3% and 99.7% respectively. There was no significant difference in attendance  
176 between the both group at the above two time nodes,  $P > 0.05$ . The detailed  
177 attendance is shown in Table 3.

## 178 **Evaluation of Teaching Quality**

179 A total of 952 effective feedback questionnaires were collected, including 395 in  
180 the trial group and 557 in the validation group. The feedback of "good and very  
181 good" on the index of "rigorous teaching attitude" in the validation group was  
182 lower than that in the trial group, accounting for 96.9% and 99.7% respectively,  
183  $P=0.002$ . In terms of "punctual class" index, the feedback of "good and very good"  
184 in the validation group was lower than that in the trial group, accounting for 97.8%  
185 and 99.5% respectively,  $P=0.037$ . There was no significant difference in attendance  
186 between the both group on the seven indexes of "detailed and accurate teaching  
187 content", "reasonable structure and clear process", "highlighting teaching key  
188 points", "clear teaching difficulties", "accurate and refined language", "combining  
189 theory with clinical practice", and "Improving ability to analyze and deal with the  
190 disease" ,  $P > 0.05$ . In general, all the indicators of the teaching quality evaluated as  
191 "good and very good" accounted for more than 96%. The detailed evaluation of  
192 teaching quality is shown in Table 4.

## 193 **Overall Evaluation of Flipped Teaching**

194 In the overall evaluation of Flipped Teaching based on Video Conference, a total of  
195 952 valid questionnaires were collected through the questionnaire star. 25 and 49  
196 questionnaires with feedback of "improvement suggestions" were collected in the  
197 trial group and the validation group, accounting for 6.3% and 8.8% respectively;  
198 And there was no significant difference between the both groups,  $P > 0.05$ . 144  
199 and 120 questionnaires with feedback of "none" were collected in the trial group  
200 and the validation group, accounting for 36.5% and 21.5%, respectively; And the  
201 feedback of "none" from the validation group was lower than those from the trial  
202 group,  $P < 0.001$ . 226 and 388 questionnaires with feedback of "Praise highlights"  
203 were collected in the trial group and the validation group, accounting for 57.2%  
204 and 69.7%, respectively; And the feedback of "Praise highlights" from the validation  
205 group was higher than those from the trial group,  $P < 0.001$ . The detailed overall  
206 evaluation of feedback is shown in Table 5.

## 207 **Discussion**

208 This research on Flipped Teaching with Video Conference as the carrier was based  
209 on the good results achieved by the teaching model in the early stage[2]. The  
210 implementation and evaluation of the Flipped Teaching based on Video  
211 Conference in April and June were compared and analyzed to further verify the

212 training effect and repeatability of this teaching model. To this end, we carried on  
213 the following six aspects of analysis and elaboration to this study.

### 214 **Highlights of the Study**

215 The infectious diseases training was a necessary part of the standardized training  
216 for internal medicine residents. For internal medicine residents who could not carry  
217 out the training in the Department of Infectious Diseases according to the original  
218 plan, the Flipped Teaching on the carrier of Video Conference was carried out to  
219 effectively make up for the shortage of the actual training period in the  
220 Department of Infectious Diseases. Through scientific design and teaching practice,  
221 the training effect and repeatability of this model were verified, and the application  
222 value and promotion of Flipped Teaching based on Video Conference in infectious  
223 disease training were clarified. The Flipped Teaching based on Video Conference  
224 could be conducted to the smooth progress of standardized training for residents  
225 in the region and had obvious global concept and social significance.

### 226 **Key Points of the Study**

227 The teaching research adopted "vertical management mode". Since the "vertical  
228 management mode" established had gained good experience and evaluation in  
229 the field of standardized training for public health physicians and internal medicine  
230 residents, the organizer of which should have managerial, clinical and research  
231 capabilities[2-3]. Therefore, the application of this management mode in this  
232 teaching was an important basis to ensure the smooth development of this  
233 teaching research and obtain good feedback. As the residents participating in  
234 the training of infectious diseases came from many hospitals, the supports from  
235 the teaching administrative departments and training bases of all dispatched  
236 hospitals were also important factors to ensure the smooth progress of the  
237 teaching. Furthermore, according to the requirements of the training syllabus and  
238 the training purpose, it was also the key to clarify the training contents and  
239 references to ensure the quality of Flipped Teaching based on Video Conference.

### 240 **Comparison with Related Literature**

241 With the publication of the paper "Educators propose 'flipping' medical training" in  
242 2012[4], Flipped Teaching had been studied and applied more and more in the  
243 field of medical education, such as Cardiology[5], Internal Medicine[6,7],  
244 Anaesthesiology[8], Rheumatology[9], Pathology[10], Radiology[11],  
245 Nutriology[12], dermatologic surgery[13,14], Nursing[15], et cetera, and teaching  
246 and research achievements of different degrees were achieved. Generally, in the

247 evaluation of Flipped Teaching from the above literature cited, more initiators and  
248 researchers were more likely to draw positive conclusions from impressive  
249 teaching achievements and put forward the positive significance of Flipped  
250 Teaching.[5-15] However, there were different opinions on Flipped Teaching for  
251 that some participants themselves were not familiar with the organization and  
252 implementation of Flipped Teaching, some residents lacked clinical knowledge  
253 reserve, and the preparation time of flipped teaching was relatively long[16.17].

254 In view of the fact that there was no unified definition and implementation of  
255 Flipped Teaching in the teaching field, and Inconsistent background and  
256 application domain of this kind of teaching, there were great differences in  
257 teaching practice. Therefore, I had made a detailed definition and practice of this  
258 Flipped Teaching; Including the following aspects: "vertical management mode"  
259 was adopted for this teaching, clinical teaching was carried by Video Conference,  
260 the teaching subjects were led by residents, the teaching contents were based on  
261 the requirements of the Standardized Training Content and Standard for Resident  
262 Physicians, the teaching reference materials were based on the latest clinical  
263 guidelines and experts consensus of infectious diseases, characteristic teaching  
264 programs and training plans were developed by all participants, every Flipped  
265 Teaching was managed in the whole process, all joint training unit of those  
266 residents needed to participate in the teaching management and assessment of  
267 residents, and the effect of every Flipped Teaching would be evaluated by all  
268 residents and the organizer.

### 269 **Interpretation of Relevant Data in the Study**

270 There was no significant difference in baseline data between the both groups ( $P >$   
271  $0.05$ ), indicating that the study was comparable and the conclusions were reliable.  
272 The implementation of the teaching plan is good; In addition to "teaching on the  
273 planned time", the completion rate of the other teaching plan indicators reached  
274 100%; Some residents could not carry out teaching on time; which was also related  
275 to that some residents were unfamiliarity with teaching software, or they were  
276 performing part of the clinical work at that point. The attendance rates of the both  
277 groups was high, above 98%; And this was higher than Flipped Teaching in other  
278 areas, where attendance was 30-80%[4], which might be related to the cooperation  
279 of residents, the support of joint training units and the influence of the teaching  
280 organizers. The teaching quality evaluation was generally good, and the feedbacks  
281 of all indicators were "good and very good" accounted for more than 96%; Among  
282 them, the evaluation of "rigorous teaching attitude" and "punctual class" by  
283 residents in June was lower than that in April ( $P < 0.05$ ), which might be related to



284 the fact that most of the residents in June were also engaged in clinical work, while  
285 most of the internal medicine residents were on vacation in April. In terms of the  
286 overall evaluation of the teaching, there was no significant difference between the  
287 two groups in the evaluation of "suggestions for improvement" ( $P > 0.05$ ); The  
288 evaluation of "praise highlights" put forward by residents in June was higher than  
289 that of internal medicine residents in April ( $P < 0.05$ ), which reflected that the  
290 Flipped Teaching based on Video Conference was more recognized by later  
291 residents along with this teaching model continuing to advance.

### 292 **Advantages of the Study**

293 The rapid increase in medical knowledge and clinical workload had resulted in a  
294 relatively limited amount of time for clinicians and residents to undertake effective  
295 training. The Flipped Teaching based on Video Conference could make up for the  
296 defects. Teaching and training could be arranged during off-peak hours by this  
297 teaching model; That could not only get rid of the space limitation of clinical  
298 training, but also reduce the time constraint of clinical teaching. Therefore, the  
299 Flipped Teaching based on Video Conference had good application value.

300 In order to further verify the feasibility and effectiveness of the Flipped Teaching  
301 based on Video Conference, both groups of queues were designed to conduct  
302 control study. The infectious diseases training by the Flipped Teaching based on  
303 Video Conference for residents was carried out again in June, and compared with  
304 the same teaching method for residents in April. The repeatability of the training  
305 effect of Flipped Teaching based on Video Conference was further verified. All the  
306 above embodied the scientific nature of this teaching research.

### 307 **Limitations of the Study**

308 The Flipped Teaching based on Video Conference adopted online whole-process  
309 monitoring, and three time nodes of "online on time", "middle roll call" and "end  
310 on time" were selected to be included in the statistics. However, due to incomplete  
311 data of "middle roll call", the data of "middle roll call" was not included in this study  
312 for attendance statistical analysis. This was the deficiency of this teaching research.  
313 Moreover, since the number of residents participating in the Flipped Teaching  
314 based on Video Conference was small, this model was suitable for the training of  
315 small groups. For a large number of resident training, a new study with larger  
316 sample would be needed to support.

317 At the beginning of this teaching model, the project had high requirements for  
318 the teaching organizer. The organizer owned management background and  
319 clinical work background, and also needed the education background and

320 teaching background; At the same time, it called for good scientific research ability  
321 for teaching evaluation and promotion. The high standard requirements for the  
322 organizer at the beginning of the project were important foundations to ensure  
323 the smooth progress of this teaching mode. However, once the teaching had been  
324 successfully promoted, a systematic flipped teaching mode was formed, and the  
325 follow-up work would not be so high demand for the organizers.

## 326 **Conclusions**

327 It is generally feasible to carry out infectious disease training for internal medicine  
328 residents with Flipped Teaching based on Video Conference as the carrier, and the  
329 teaching plan execution and teaching feedback are good, and the training effect is  
330 obvious. This teaching model can be further promoted and applied in the  
331 standardized training of residents.

## 332 **Ethical Approval and Consent to Participate**

333 Informed consents of participants in the standardized training for internal  
334 medicine residents were obtained for the training and the study. The study  
335 received Institutional Review Board (IRB) approval by the Shanghai Public Health  
336 Clinical Center Ethics Committee. The IRB number was No. 2021-S026-01.

## 337 **Acknowledgments**

338 This study was supported by the internal medicine residents who had participated  
339 in the standardized training for residents in Shanghai. Thanks to the teaching  
340 administration department and the resident standardized training base of the  
341 united training hospital for their support. Thanks for the support of Shanghai and  
342 National administration department of standardized training for resident  
343 physicians.

## 344 **Authors' Contributions**

345 Xiao-Yu Zhang made conception, design, acquisition of data, analysis and  
346 interpretation of data, drafted and revised the manuscript, and agreed to be  
347 accountable for all aspects of the work.

## 348 **Funding**

349 This research received no external funding.

## 350 **Disclosure**

351 The author declares no competing financial and / or non-financial interests.

## 352 **Consent for publication**

353 The author has read and agreed to the published version of the manuscript.

## 354 **Literature share statement**

355 The model included in the manuscript submitted to the journal is transparent.

356 Consent from the corresponding author is required for any institution or individual

357 to reprint this document.

## 358 **References**

359 [1] Shanghai health and family planning commission, Notice on strengthening  
360 standardized training of residents in Shanghai for rotation training of infection  
361 department of internal medicine residents.

362 <http://wsjkw.sh.gov.cn/kjy2/20180815/0012-57913.html>

363 [2] Zhang XY. Application and Evaluation of Flipped Teaching Based on Video  
364 Conference in Standardized Training for Internal Medicine Residents during  
365 Vacation. bioRxiv; 2022.

366 [doi: 10.1101/2022.04.17.488599](https://doi.org/10.1101/2022.04.17.488599)

367 [3] Zhang XY. Rapid Clinical Promotion Model of Standardized Training for Public  
368 Health Physicians in China. Adv Med Educ Pract. 2021;12:463-471.

369 [doi:10.2147/AMEP.S306737](https://doi.org/10.2147/AMEP.S306737)

370 [4] Vogel L. Educators propose "flipping" medical training. CMAJ.  
371 2012;184(12):E625-E626.

372 [doi:10.1503/cmaj.109-4212](https://doi.org/10.1503/cmaj.109-4212)

373 [5] Narang A, Velagapudi P, Rajagopalan B, et al. A New Educational Framework to  
374 Improve Lifelong Learning for Cardiologists. J Am Coll Cardiol. 2018;71(4):454-462.

375 [doi:10.1016/j.jacc.2017.11.045](https://doi.org/10.1016/j.jacc.2017.11.045)

376 [6] Bonnes SL, Ratelle JT, Halvorsen AJ, et al. Flipping the Quality Improvement  
377 Classroom in Residency Education. Acad Med. 2017;92(1):101-107.

378 [doi:10.1097/ACM.0000000000001412](https://doi.org/10.1097/ACM.0000000000001412)

379 [7] Wittich CM, Agrawal A, Wang AT, et al. Flipped Classrooms in Graduate Medical  
380 Education: A National Survey of Residency Program Directors. Acad Med.

381 [2018;93\(3\):471-477. doi:10.1097/ACM.0000000000001776](https://doi.org/10.1097/ACM.0000000000001776)

382 [8] Kurup V, Sendlewski G. The Feasibility of Incorporating a Flipped Classroom  
383 Model in an Anesthesia Residency Curriculum-Pilot Study. Yale J Biol Med.

384 2020;93(3):411-417. Published 2020 Aug 31.

- 385 [9] Wade SD, Freed JA, Kyttaris VC, Saunders S, Hausmann JS. Implementing a  
386 Virtual Flipped Classroom in a Rheumatology Fellowship Program [published  
387 online ahead of print, 2021 Sep 22]. *Arthritis Care Res (Hoboken)*.  
388 [2021;10.1002/acr.24791](https://doi.org/10.1002/acr.24791). doi:10.1002/acr.24791
- 389 [10] Koch LK, Chang OH, Dintzis SM. Medical Education in Pathology: General  
390 Concepts and Strategies for Implementation. *Arch Pathol Lab Med*.  
391 2021;145(9):1081-1088.  
392 [doi:10.5858/arpa.2020-0463-RA](https://doi.org/10.5858/arpa.2020-0463-RA)
- 393 [11] Tan N, Bavadian N, Lyons P, Lochhead J, Alexander A. Flipped Classroom  
394 Approach to Teaching a Radiology Medical Student Clerkship. *J Am Coll Radiol*.  
395 2018;15(12):1768-1770.  
396 [doi:10.1016/j.jacr.2018.07.017](https://doi.org/10.1016/j.jacr.2018.07.017)
- 397 [12] Riddle E, Gier E, Williams K. Utility of the Flipped Classroom When Teaching  
398 Clinical Nutrition Material. *J Acad Nutr Diet*. 2020;120(3):351-358.  
399 [doi:10.1016/j.jand.2019.09.015](https://doi.org/10.1016/j.jand.2019.09.015)
- 400 [13] Tassavor M, Shah A, Hashim P, Torbeck R. Flipped classroom curriculum for  
401 dermatologic surgery during COVID-19: A prospective cohort study. *J Am Acad*  
402 *Dermatol*. 2021;85(5):e297-e298.  
403 [doi:10.1016/j.jaad.2021.06.891](https://doi.org/10.1016/j.jaad.2021.06.891)
- 404 [14] Liu KJ, Tkachenko E, Waldman A, et al. A video-based, flipped classroom,  
405 simulation curriculum for dermatologic surgery: A prospective, multi-institution  
406 study. *J Am Acad Dermatol*. 2019;81(6):1271-1276.  
407 [doi:10.1016/j.jaad.2019.03.078](https://doi.org/10.1016/j.jaad.2019.03.078)
- 408 [15] Hu R, Gao H, Ye Y, Ni Z, Jiang N, Jiang X. Effectiveness of flipped classrooms in  
409 Chinese baccalaureate nursing education: A meta-analysis of randomized  
410 controlled trials. *Int J Nurs Stud*. 2018;79:94-103.  
411 [doi:10.1016/j.ijnurstu.2017.11.012](https://doi.org/10.1016/j.ijnurstu.2017.11.012)
- 412 [16] Hew KF, Lo CK. Flipped classroom improves student learning in health  
413 professions education: a meta-analysis. *BMC Med Educ*. 2018;18(1):38. Published  
414 2018 Mar 15.  
415 [doi:10.1186/s12909-018-1144-z](https://doi.org/10.1186/s12909-018-1144-z)
- 416 [17] Evans L, Vanden Bosch ML, Harrington S, Schoofs N, Coviak C. Flipping the  
417 classroom in health care higher education: a systematic review. *Nurse Educ*  
418 2019;44:74-78.  
419 [doi:10.1097/NNE.0000000000000554](https://doi.org/10.1097/NNE.0000000000000554)

**Table 1** Baseline of Internal Medicine Residents Participating in Flipped Teaching

| Indicators                                  | Trial group(n=19) | Validation group(n=24) | <i>p</i> value |
|---------------------------------------------|-------------------|------------------------|----------------|
| Sexuality [male, n, (%) ]                   | 9 (47. 4)         | 6 (25. 0)              | 0. 126         |
| Age [years, Mean±standard deviation]        | 29. 5±3. 1        | 28. 5±3. 0             | 0. 287         |
| Education background                        |                   |                        |                |
| Bachelor degree[n, (%) ]                    | 5 (26. 3)         | 11 (45. 8)             | 0. 189         |
| Master degree[n, (%) ]                      | 4 (21. 1)         | 4 (16. 7)              | 1. 000         |
| Doctor degree[n, (%) ]                      | 10 (52. 6)        | 9 (37. 5)              | 0. 321         |
| Qualified as a licensed physician [n, (%) ] | 17 (89. 5)        | 23 (95. 8)             | 0. 575         |
| Training phase                              |                   |                        |                |
| First year of training[n, (%) ]             | 2 (10. 5)         | 0 (0)                  | 0. 189         |
| Second year of training[n, (%) ]            | 12 (63. 2)        | 17 (70. 8)             | 0. 594         |
| Third year of training[n, (%) ]             | 5 (26. 3)         | 7 (29. 2)              | 0. 836         |
| From tertiary hospitals [n, (%) ]           | 19 (100)          | 24 (100)               | –              |

**Table 2** Statistical Table of Evaluation of Teaching Plan Implementation

| Teaching plan indicators[n, (%)]                   | Trial group (n=31)    | Validation group (n=24) | <i>p</i> value |
|----------------------------------------------------|-----------------------|-------------------------|----------------|
|                                                    | Coincidence times (%) | Coincidence times (%)   |                |
| Topic selection based on training syllabus         | 31 (100)              | 24 (100)                | –              |
| Teaching on the planned time                       | 29 (93.5)             | 22 (91.7)               | 1.000          |
| Teaching on the planned content                    | 31 (100)              | 24 (100)                | –              |
| Making PPT fully                                   | 31 (100)              | 24 (100)                | –              |
| Providing references                               | 31 (100)              | 24 (100)                | –              |
| Unifying the teaching content and training program | 31 (100)              | 24 (100)                | –              |
| Participating in after-class discussion            | 31 (100)              | 24 (100)                | –              |

**Table 3** Total Attendance of of Flipped Teaching

| Attendance indicators[n, (%)] | Trial group (n=585)       | Validation group (n=588)  | <i>p</i> value |
|-------------------------------|---------------------------|---------------------------|----------------|
|                               | Total attendance times(%) | Total attendance times(%) |                |
| Online on time                | 585 (99.3)                | 566 (98.3)                | 0.098          |
| End on time                   | 588 (99.8)                | 574 (99.7)                | 0.621          |

**Table 4** Statistical Table of Flipped Teaching Quality Evaluation

| Teaching quality indicators[n, (%)]                    | Trial group (n=395)  | Validation group (n=557) | <i>p</i> value |
|--------------------------------------------------------|----------------------|--------------------------|----------------|
|                                                        | Good & very good (%) | Good & very good (%)     |                |
| Rigorous teaching attitude                             | 394 (99.7)           | 540 (96.9)               | 0.002          |
| Punctual class                                         | 393 (99.5)           | 545 (97.8)               | 0.037          |
| Detailed and accurate teaching content                 | 388 (98.2)           | 536 (96.2)               | 0.072          |
| Reasonable structure and clear process                 | 388 (98.2)           | 546 (98.0)               | 0.821          |
| Highlighting teaching key points                       | 390 (98.7)           | 542 (97.3)               | 0.130          |
| Clear teaching difficulties                            | 386 (97.7)           | 536 (96.2)               | 0.194          |
| Accurate and refined language                          | 388 (98.2)           | 541 (97.1)               | 0.276          |
| Combining theory with clinical practice                | 387 (98.0)           | 542 (97.3)               | 0.509          |
| Improving ability to analyze and deal with the disease | 388 (98.2)           | 543 (97.5)               | 0.443          |



**Table 5** Overall Evaluation of Flipped Teaching

| Evaluation indicators[n, (%)] | Trial group (n=395)  | Validation group (n=557) | <i>p</i> value |
|-------------------------------|----------------------|--------------------------|----------------|
|                               | Good & very good (%) | Good & very good (%)     |                |
| Improvement suggestions       | 25 (6.3)             | 49 (8.8)                 | 0.161          |
| None                          | 144 (36.5)           | 120 (21.5)               | <0.001         |
| Praise highlights             | 226 (57.2)           | 388 (69.7)               | <0.001         |
